# Supplementary material for: In situ O2 dynamics in submerged Isoetes australis: varied leaf gas permeability influences underwater photosynthesis and internal O2
Source: PubMed Central journal article supplement — J Exp Bot. 2011 Aug 12;62(13):4691–700. doi: 10.1093/jxb/err193 (PMC3170561; doi:10.1093/jxb/err193), 2011-08-12

*In situ* O<sub>2</sub> dynamics in submerged *Isoetes australis*: varied leaf gas permeability influences underwater photosynthesis and internal O<sub>2</sub>

Ole Pedersen, Cristina Pulido, Sarah Meghan Rich and Timothy David Colmer

**Fig. 1S** (supplementary material) – *In situ* O<sub>2</sub> dynamics in a leaf of *Isoetes australis*, the sediment of the rhizosphere and the water column (a-c) and incident light and temperature (day 1-2) over a diurnal cycle in 3 granite vernal pool. O<sub>2</sub> microelectrodes were inserted into a leaf lacuna of a fully expanded leaf, into the sediment (10 mm depth) and at canopy height in the water column.

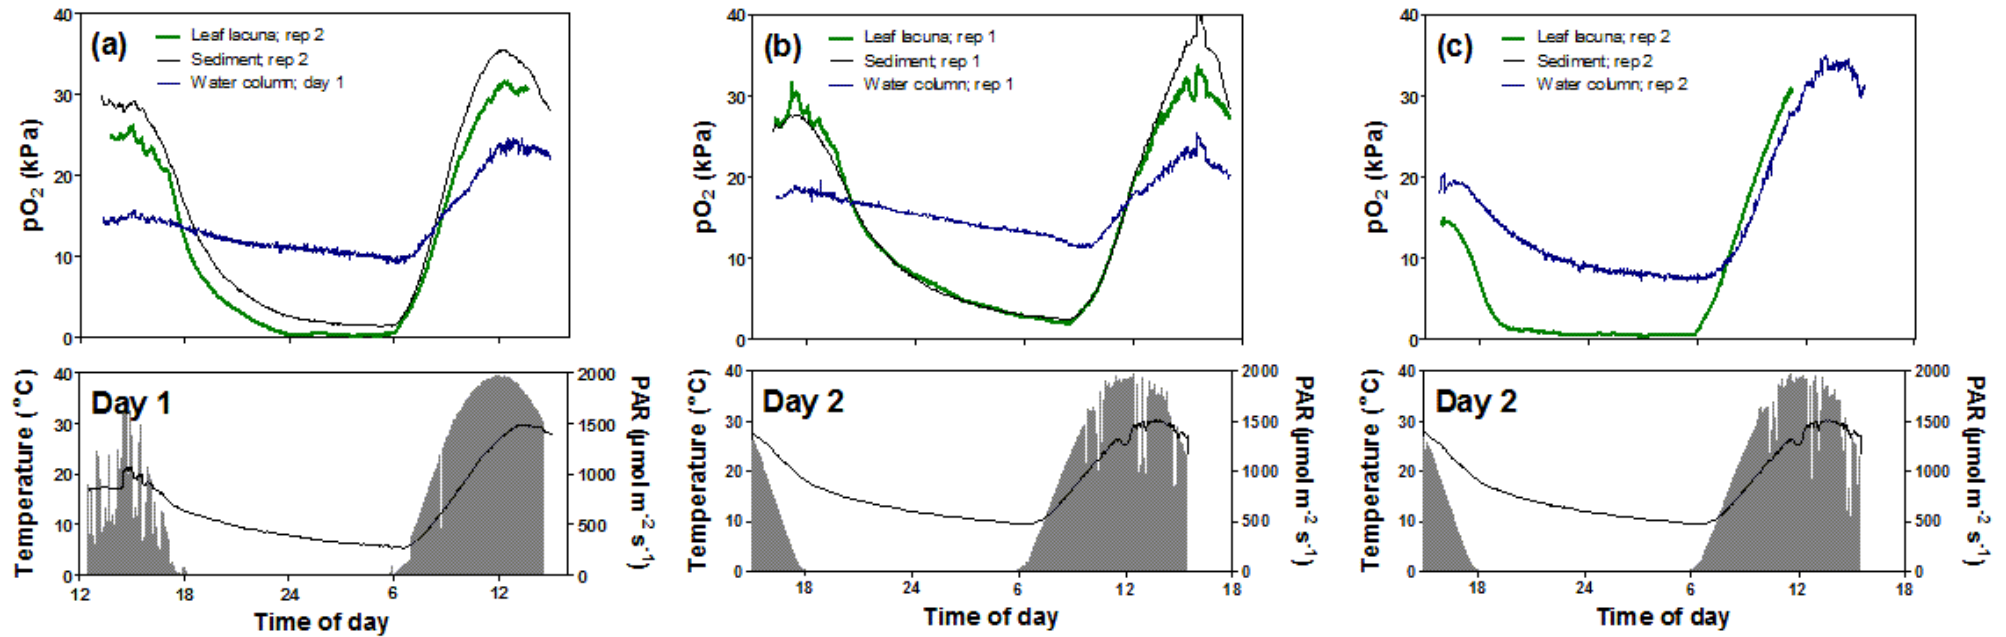

Supplement: supp_err193_00061846_file001.pdf [file supp_err193_00061846_file001.pdf]
